1 **Full article title:** Musculoskeletal phenotypes in 3q29 deletion syndrome

2 **Authors:** Rebecca M Pollak<sup>1</sup>, Jacob C Tilmon<sup>2</sup>, Melissa M Murphy<sup>3</sup>, Michael J Gambello<sup>4</sup>,

3 Rossana Sanchez Russo<sup>4</sup>, John P Dormans<sup>5</sup>, Jennifer G Mulle<sup>1,6</sup>

4 **Affiliations:** <sup>1</sup>Center for Advanced Biotechnology and Medicine, Robert Wood Johnson Medical

5 School, Rutgers University; <sup>2</sup>Indiana University School of Medicine; <sup>3</sup>Department of Pediatrics,

6 Emory University School of Medicine; <sup>4</sup>Department of Human Genetics, Emory University

7 School of Medicine; <sup>5</sup>Emeritus Professor of Orthopedic Surgery, University of Pennsylvania;

8 <sup>6</sup>Department of Psychiatry, Robert Wood Johnson Medical School, Rutgers University

9 **Corresponding author information:** Jennifer Gladys Mulle, MHS, PhD; Center for Advanced

10 Biotechnology and Medicine and Department of Psychiatry, Robert Wood Johnson Medical

11 School, Rutgers University, 679 Hoes Lane West, Piscataway, NJ 08854; 848-445-9866;

12 [jennifer.mulle@rutgers.edu](mailto:jennifer.mulle@rutgers.edu)

13 **Funding:** NIH R01 MH110701, NIH T32 GM0008490

14 **Competing interests:** The authors have no conflicts of interest to report.

15 **Availability of data and materials:** The datasets used and/or analyzed during the current study

16 are available from the corresponding author on reasonable request.

17 **Ethics approval and consent to participate:** This study was approved by Emory University's

18 Institutional Review Board (IRB00064133) and Rutgers University's Institutional Review Board

19 (PRO2021001360). All study subjects gave informed consent prior to participating in this study.

20 **Consent for publication:** Not applicable.

21 **Acknowledgements:** We gratefully acknowledge our study population, the 3q29 deletion

22 community, for their participation and commitment to research.

23 **Authors' contributions:** RMP performed the statistical analysis, produced all figures and tables,  
24 and wrote the manuscript. JCT performed the initial literature review, designed the survey  
25 instrument, collected the data, and performed the preliminary data analysis. MMM, MJG, RSR,  
26 JPD, and JGM contributed to the study design, data collection, and preliminary data analysis.  
27 MMM and MJG assisted in refining the survey instrument. JGM edited the manuscript and  
28 provided guidance on analyzing and interpreting data. JGM was the principal investigator  
29 responsible for study direction. All authors participated in commenting on the drafts and have  
30 read and approved the final manuscript.

31 **Abstract**

32 3q29 deletion syndrome (3q29del) is a rare genomic disorder caused by a 1.6 Mb deletion  
33 (hg19, chr3:195725000–197350000). 3q29del is associated with neurodevelopmental and  
34 psychiatric phenotypes, including an astonishing >40-fold increased risk for schizophrenia, but  
35 medical phenotypes are less well-described. We used the online 3q29 registry  
36 (3q29deletion.org) to recruit 57 individuals with 3q29del (56.14% male) and requested  
37 information about musculoskeletal phenotypes with a custom questionnaire. 85.96% of  
38 participants with 3q29del reported at least one musculoskeletal phenotype. Congenital  
39 anomalies were most common (70.18%), with pes planus (40.35%), pectus excavatum (22.81%),  
40 and pectus carinatum (5.26%) significantly elevated relative to the pediatric general population.  
41 49.12% of participants reported fatigue after 30 minutes or less of activity. Bone fractures  
42 (8.77%) were significantly elevated relative to the pediatric general population, suggesting  
43 3q29del impacts bone strength. Participants commonly report receiving medical care for  
44 musculoskeletal complaints (71.93%), indicating that these phenotypes impact quality of life for  
45 individuals with 3q29del. This is the most comprehensive description of musculoskeletal  
46 phenotypes in 3q29del to date, suggests ideas for clinical evaluation, and expands our  
47 understanding of the phenotypic spectrum of this syndrome.

48 **Keywords:** 3q29 deletion; musculoskeletal; orthopedic; copy number variant; genomic disorder

## 49 Introduction

50 The 3q29 deletion is a rare (~1:30,000) (Kendall et al., 2017; Stefansson et al., 2014) 1.6  
51 Mb deletion on chromosome 3 (hg19, chr3:195725000–197350000) (Ballif et al., 2008;  
52 Glassford et al., 2016; Willatt et al., 2005). Individuals with 3q29 deletion syndrome (3q29del)  
53 are at substantially increased risk for a variety of neurodevelopmental and neuropsychiatric  
54 phenotypes, including mild to moderate intellectual disability (ID), a 19-fold increased risk for  
55 autism spectrum disorder (ASD), and a greater than 40-fold increased risk for schizophrenia (SZ)  
56 (Ballif et al., 2008; Cox & Butler, 2015; Girirajan et al., 2012; Glassford et al., 2016; Itsara et al.,  
57 2009; Kirov et al., 2012; Klaiman et al., 2022; Marshall et al., 2017; Mulle, 2015; Mulle et al.,  
58 2010; Pollak et al., 2019; Sanchez Russo et al., 2021; Sanders et al., 2015; Szatkiewicz et al.,  
59 2014; Willatt et al., 2005). Medical features of 3q29del are less well-defined, with most reports  
60 focusing on the high rate of cardiac manifestations associated with the 3q29 deletion, namely  
61 congenital heart defects (Cox & Butler, 2015). However, more work is needed to define the  
62 spectrum of other medical phenotypes associated with the 3q29 deletion.

63 Musculoskeletal complaints, including axial, extremity, and neuromuscular phenotypes,  
64 have been associated with an array of copy number variant disorders that have other  
65 phenotypic similarities to 3q29del. Significant musculoskeletal phenotypes have been identified  
66 in carriers of the 22q11.2 deletion, 16p11.2 reciprocal deletion and duplication, and 7q11.23  
67 deletion (Williams syndrome) (Al-Kateb et al., 2014; Bassett et al., 2005; Chapman et al., 1996;  
68 Cherniske et al., 2004; Copes et al., 2016; Damasceno et al., 2014; Digilio et al., 2003; Ficcadenti  
69 et al., 2015; Homans et al., 2018; Kaplan et al., 1989; Martin et al., 1984; Morava et al., 2002;  
70 Morris et al., 1988; Ren et al., 2020; Ricchetti et al., 2004; Stagi et al., 2010; Taeusch et al.,

71 2004; Wu et al., 2015). These phenotypes include high rates of scoliosis, joint phenotypes  
72 including joint laxity and joint contractures, and reduced bone density. Similarly, some  
73 musculoskeletal phenotypes have been associated with 3q29del, including chest cavity  
74 deformities and finger and toe anomalies (Cox & Butler, 2015; Sanchez Russo et al., 2021). One  
75 of these studies, performed by members of our team, diagnosed musculoskeletal anomalies via  
76 direct clinical assessment of 3q29 deletion carriers by trained medical geneticists (Sanchez  
77 Russo et al., 2021). However, musculoskeletal concerns were not the main focus of either of  
78 these studies, and more detail is needed to understand the full phenotypic spectrum associated  
79 with the 3q29 deletion.

80 In the present study, we report the spectrum of musculoskeletal phenotypes  
81 systematically ascertained from a large cohort of individuals with 3q29del. Using a custom  
82 questionnaire, we were able to assess various domains of musculoskeletal function, including  
83 axial, extremity, and neuromuscular phenotypes; imaging procedures; and medical  
84 interventions. These data expand our understanding of the greater phenotypic spectrum  
85 associated with the 3q29 deletion and provide important insight regarding an under-reported  
86 phenotypic domain.

## 87 **Methods**

### 88 *Editorial policies and ethical considerations*

89 This study was approved by Emory University's Institutional Review Board  
90 (IRB00064133) and Rutgers University's Institutional Review Board (PRO2021001360).

### 91 *Sample*

92           57 individuals with 3q29 deletion syndrome (56.14% male) were recruited from the  
93 online 3q29 deletion registry (3q29deletion.org), ranging in age from 0.75-46.5 years (mean =  
94 12.02 ± 9.37 years). Inclusion criteria for the present study were membership in the 3q29  
95 deletion registry as of June 2020 and fluency in English. Participants gave informed consent to  
96 participate in the study via an online form. A description of the study sample can be found in  
97 Table 1.

### 98 *Measures*

99           A custom survey instrument was designed by a member of the study team to assess  
100 musculoskeletal phenotypes and was reviewed by expert clinicians. The survey consisted of 74  
101 questions across 7 different domains related to musculoskeletal function, including axial and  
102 extremity skeleton pathology, joint pathology, neuromuscular function, presence of congenital  
103 malformations, other common pediatric musculoskeletal conditions, and any medical  
104 treatments received (Supplemental Information). Demographic data was collected separately  
105 as a part of the 3q29 deletion registry. Questionnaires were filled out by parents or primary  
106 caregivers. The survey was hosted on a local REDCap database, and a link to the survey with  
107 instructions was emailed to members of the 3q29 deletion registry between June and July of  
108 2020.

### 109 *Analysis*

110           All analyses were performed in R version 4.0.4 (R Core Team, 2008). Data were  
111 summarized as counts and proportions of the total participants that reported a given  
112 phenotype. The rate of phenotypes in our study sample was compared to the pediatric general  
113 population using an exact binomial test via the base R package (R Core Team, 2008). Pediatric

114 general population prevalence rates were established from previously published large studies  
115 focusing on pediatric cohorts with an age range similar to that of our study subjects with  
116 3q29del (García-Rodríguez et al., 1999; Konieczny et al., 2013; Naranje et al., 2016; Westphal et  
117 al., 2009). Data visualization was performed using the plotly R package (Sievert et al., 2017).

## 118 **Results**

### 119 *High rates of reported musculoskeletal complaints in individuals with 3q29del*

120 Participants with 3q29del overwhelmingly reported musculoskeletal phenotypes, with  
121 85.96% (n=49) of participants reporting at least one musculoskeletal complaint. The most  
122 common phenotypic category was congenital anomalies, with 70.18% (n=40) of participants  
123 reporting one or more (Figure 1). Excluding congenital phenotypes, 40.35% (n=23) of  
124 participants reported at least one joint problem, 15.79% (n=9) of participants reported at least  
125 one pain problem, and 59.65% (n=34) of respondents reported at least one neuromuscular  
126 problem (Figure 1).

127 Respondents more commonly reported phenotypes in the extremities (68.42%, n=39)  
128 compared to axial (36.84%, n=21) or neuromuscular (59.65%, n=34) manifestations (Table 2).  
129 The most commonly reported extremity phenotype was pes planus (40.35%, n=23), followed by  
130 joint stiffness (28.07%, n=16) (Table 2). The most commonly reported axial phenotype was  
131 pectus excavatum (22.81%, n=13) (Table 2). The most commonly reported neuromuscular  
132 phenotype was fatigue in 30 minutes or less of physical activity (49.12%, n=28), followed by gait  
133 anomalies (36.84%, n=21) (Table 2).

### 134 *Variable presence of congenital anomalies within 3q29 deletion carriers*



135 While 68.85% of participants with 3q29del reported at least one congenital anomaly,  
136 the specific phenotypes experienced by study participants varied. The most commonly reported  
137 congenital anomaly was pes planus (40.35%, n=23), followed by a unique or atypical facial  
138 structure (31.58%, n=18) and pectus excavatum (22.81%, n=13) (Figure 2A). To determine  
139 whether the reports of congenital anomalies by our study subjects was higher than the  
140 pediatric general population, we compared the prevalence of three specific phenotypes. Pes  
141 planus (40.35%, n=23,  $p < 2.2E-16$ ), pectus excavatum (22.81%, n=13,  $p = 3.41E-13$ ), and pectus  
142 carinatum (5.26%, n=3,  $p = 0.007$ ) were all reported at significantly higher rates by our study  
143 subjects compared to the pediatric general population (2.7%, 1.275%, and 0.675%, respectively)  
144 (García-Rodríguez et al., 1999; Westphal et al., 2009), suggesting that the 3q29 deletion confers  
145 an increased risk for congenital musculoskeletal anomalies.

#### 146 *Joint complaints in 3q29 deletion carriers are driven by joint stiffness*

147 Joint problems were a commonly reported phenotype in our study sample. To  
148 determine whether there were specific areas of concern versus an equal distribution of  
149 complaints across categories, we compared the different classes of joint phenotypes included  
150 on our survey instrument. We found that the majority of participants that reported joint  
151 problems reported joint stiffness (28.07%, n=16) (Figure 2B). Joint laxity was not commonly  
152 reported by our participants, with rates ranging from 0% (shoulder and knee laxity) to 7.02%  
153 (n=4, finger laxity) (Figure 2B). These data suggest that the 3q29 deletion does not have a  
154 strong phenotypic impact on joint function.

#### 155 *High rate of fatigue in individuals with 3q29del*

156 To determine the level of musculoskeletal endurance in our study population, we asked  
157 how long the individual with 3q29del can participate in physical activity before becoming  
158 fatigued. 49.12% (n=28) of our study participants reported becoming fatigued after 30 minutes  
159 or less of physical activity (Table 2, Figure 2C). Study participants most commonly reported  
160 becoming fatigued after 15 to 30 minutes of physical activity (36.84%, n=21) (Figure 2C). These  
161 data suggest that musculoskeletal endurance may be impaired by the 3q29 deletion.

#### 162 *Orthopedic imaging procedures among 3q29del study subjects*

163 To determine the proportion of our study sample that received any medical imaging  
164 procedures, we asked participants to report any X-ray, CT scan, or MRI performed. 36.84%  
165 (n=21) of our study sample reported receiving at least one imaging procedure. The most  
166 commonly reported imaging procedures were spinal X-ray and skull MRI (12.28%, n=7) (Table  
167 3). Rates of extremity imaging procedures were relatively low; the most commonly reported  
168 extremity imaging procedures were hand and hip X-rays (8.77%, n=5) (Table 3). These data  
169 suggest that the musculoskeletal phenotypes associated with the 3q29 deletion may not  
170 commonly require advanced imaging procedures.

#### 171 *Elevated rate of bone fractures associated with the 3q29 deletion*

172 Coincident with the relatively low rates of diagnostic imaging received by our study  
173 sample, few participants reported medical diagnoses confirmed by imaging procedures.  
174 Notably, 8.77% (n=5) of our study sample reported a bone fracture confirmed by diagnostic  
175 imaging (Table 4); this is significantly elevated compared to the pediatric general population  
176 prevalence of 0.947% ( $p=0.0002$ ) (Naranje et al., 2016). 7.02% (n=4) of our study sample  
177 reported scoliosis confirmed by diagnostic imaging (Table 4); this is not significantly increased

178 compared to the pediatric general population prevalence of 0.47-5.2% (midpoint=2.835%,  
179 p=0.07) (Konieczny et al., 2013), however it suggests that the 3q29 deletion may affect risk for  
180 scoliosis. These data demonstrate that the 3q29 deletion is associated with bone fracture  
181 liability. A larger sample size is needed to definitively determine whether 3q29 deletion  
182 participants have scoliosis at a significantly increased rate compared to the pediatric general  
183 population.

#### 184 *Medical care for musculoskeletal complaints is common for 3q29 deletion carriers*

185 We sought to determine whether the musculoskeletal complaints present in our study  
186 sample of individuals with 3q29del are associated with high rates of medical intervention.  
187 Therefore, we asked study participants whether they had ever received physical therapy, an  
188 orthopedic evaluation, or orthopedic surgery for their musculoskeletal complaints. 71.93%  
189 (n=41) of our study participants reported receiving at least one of these medical interventions.  
190 A majority of individuals with 3q29del received physical therapy (64.91%, n=37) (Figure 3).  
191 26.79% (n=15) of our study sample received an orthopedic evaluation, and 7.02% (n=4)  
192 underwent orthopedic surgery (Figure 3). These data suggest that some musculoskeletal  
193 phenotypes associated with the 3q29 deletion are severe enough to require intervention. These  
194 data further suggest that musculoskeletal complaints in 3q29 deletion syndrome may be  
195 improved or corrected with less invasive medical interventions such as physical therapy, as  
196 compared to surgery.

#### 197 **Discussion**

198 This is the first study of 3q29del to systematically ascertain musculoskeletal phenotypes  
199 as a primary outcome measure. We found high rates of musculoskeletal phenotypes in our

200 study sample of individuals with 3q29del, with 85.96% (n=49) of participants reporting at least  
201 one complaint. Congenital anomalies (70.18%, n=40) and neuromuscular problems (59.65%,  
202 n=34) were common. Respondents reported more phenotypes localized to the extremities  
203 (68.42%, n=39) as compared to the axial skeleton (36.84%, n=21). Individuals with 3q29del also  
204 received high rates of medical interventions for their musculoskeletal phenotypes, including  
205 physical therapy (64.91%, n=37), orthopedic evaluation (26.79%, n=15), and orthopedic surgery  
206 (7.02%, n=4). Together, these data suggest that the 3q29 deletion confers a previously  
207 underappreciated risk for musculoskeletal phenotypes.

208 We found that the rates of several musculoskeletal phenotypes were significantly  
209 increased in our study sample relative to the pediatric general population (García-Rodríguez et  
210 al., 1999; Naranje et al., 2016; Westphal et al., 2009). Pes planus, pectus excavatum, pectus  
211 carinatum, and bone fractures were all elevated in our 3q29del study sample. Scoliosis was not  
212 significantly elevated in our study sample relative to the pediatric general population, though  
213 there was an increase that is suggestive of an effect (Konieczny et al., 2013). A previous review  
214 of case reports and a prior study by our team both identified high rates of chest cavity  
215 deformities, and case reports have identified scoliosis in some 3q29 deletion carriers (Cox &  
216 Butler, 2015; Sanchez Russo et al., 2021). Together with the present study, these data suggest  
217 that the 3q29 deletion confers specific, but underappreciated, risks for musculoskeletal  
218 phenotypes.

219 Musculoskeletal phenotypes have been associated with several copy number variant  
220 disorders, including 22q11.2 deletion syndrome, 16p11.2 deletion and duplication syndromes,  
221 and Williams syndrome. These syndromes have been associated with scoliosis, extremity

222 anomalies, joint problems, and reduced bone mineral density in isolated studies (Al-Kateb et al.,  
223 2014; Bassett et al., 2005; Chapman et al., 1996; Cherniske et al., 2004; Copes et al., 2016;  
224 Damasceno et al., 2014; Digilio et al., 2003; Ficcadenti et al., 2015; Homans et al., 2018; Kaplan  
225 et al., 1989; Martin et al., 1984; Morava et al., 2002; Morris et al., 1988; Ren et al., 2020;  
226 Ricchetti et al., 2004; Stagi et al., 2010; Taeusch et al., 2004; Wu et al., 2015). It has been  
227 suggested that the more pressing medical and psychiatric concerns, including congenital heart  
228 defects and elevated risk for ASD and SZ, may overshadow orthopedic concerns (Homans et al.,  
229 2018). The 3q29 deletion is also associated with a complex constellation of medical,  
230 neurodevelopmental, and neuropsychiatric comorbidities that may result in orthopedic  
231 phenotypes receiving less attention. However, the high rate of medical care reported by our  
232 population specifically for orthopedic concerns highlights the importance of assessing any  
233 relevant phenotypes early and introducing appropriate interventions, to lessen the impact of  
234 orthopedic problems across the lifespan.

235         Due to the variable nature of musculoskeletal phenotypes associated with the 3q29  
236 deletion, clinical care should address multiple areas of risk. Based on the present study, in  
237 combination with previous reports, individuals with 3q29del should receive regular orthopedic  
238 exams, including periodic scoliosis screening (Cox & Butler, 2015; Sanchez Russo et al., 2021).  
239 Regularly assessing spinal curvature will allow for early detection of any anomalies, which is  
240 critical for maximizing the benefit of early-stage, less-intensive therapeutics, such as bracing.  
241 Individuals with 3q29 deletion syndrome should also receive physical therapy assessments,  
242 including the six-minute walk test (Andersen et al., 2016; Kuettel et al., 2022), to help guide  
243 clinical care. Additionally, the significantly elevated incidence of bone fracture in our study

244 sample suggests that the 3q29 deletion may have an adverse impact on bone mineral density,  
245 which may be compounded by documented feeding challenges within the 3q29del population  
246 (Wawrzonek et al., 2022). Reduced bone mineral density has also been identified in other copy  
247 number variant disorders, including 22q11.2 deletion syndrome and Williams syndrome  
248 (Cherniske et al., 2004; Copes et al., 2016; Ficcadenti et al., 2015; Homans et al., 2018; Stagi et  
249 al., 2010). To monitor the progression of this phenotype, periodic DEXA scans or another  
250 measurement of bone mineral density, paired with basic labs including measurements of  
251 calcium and vitamin D levels, will help to guide clinical care. It is important to note the relatively  
252 low frequency of medical imaging procedures reported by our study participants; while this  
253 may indicate that the musculoskeletal phenotypes in individuals with 3q29del do not commonly  
254 require advanced imaging, it may also suggest that musculoskeletal concerns in this population  
255 receive less clinical attention as compared to the significant neurodevelopmental and  
256 behavioral manifestations of the syndrome. Because our population is relatively young, it is not  
257 known whether the 3q29 deletion is a risk factor for late-onset phenotypes related to reduced  
258 bone density, such as osteoporosis. These data highlight the importance of longitudinal follow  
259 up to assess later onset conditions.

260 While this study provides critical insight into the musculoskeletal phenotypes associated  
261 with 3q29del, it is not without limitations. First, the data was gathered via an optional survey  
262 sent out to 3q29 deletion registry participants. It is possible that those individuals who are  
263 more severely affected would be more likely to participate. This would potentially bias our  
264 results, and lead to an inflation of the rates of different musculoskeletal phenotypes. However,  
265 some respondents reported no phenotypes, suggesting that the entire study sample is not

266 comprised of severely affected individuals. Second, the data collected in this study is parent- or  
267 self-report, rather than direct clinical observation, and can be subject to recall bias. However,  
268 the elevated rates of extremity anomalies, chest wall deformities, and scoliosis mirror a large  
269 review of case studies as well as a recent publication by our team that used direct assessment  
270 (Cox & Butler, 2015; Sanchez Russo et al., 2021). Our sample is young (average age  $12.02 \pm 9.37$   
271 years) so our study cannot answer questions about later onset phenotypes. Finally, while this is  
272 the largest study of musculoskeletal phenotypes in 3q29del to date, the sample size is still  
273 limited and lacks racial and ethnic diversity. Future studies will work to increase the enrollment  
274 of underrepresented minorities in the online 3q29 deletion registry.

275         The present study is the first to systematically ascertain musculoskeletal phenotypes in  
276 a large sample of individuals with 3q29del. A majority of our study participants reported at least  
277 one musculoskeletal phenotype. Congenital phenotypes, including pectus excavatum, pectus  
278 carinatum, and pes planus, were frequently reported and were significantly elevated relative to  
279 the pediatric general population (García-Rodríguez et al., 1999; Westphal et al., 2009).  
280 Participants also reported a high rate of neuromuscular phenotypes, including gait anomalies  
281 and fatigue in 30 minutes or less of physical activity. The rate of bone fractures was significantly  
282 increased compared to the pediatric general population (Naranje et al., 2016). Medical  
283 interventions, particularly physical therapy, were common in our study sample. These data  
284 indicate that musculoskeletal phenotypes are a part of the phenotypic spectrum of the 3q29  
285 deletion. Individuals with 3q29del should be monitored for the development of orthopedic  
286 concerns, including scoliosis and reduced bone mineral density. Clinical monitoring, combined

287 with early interventions, including physical therapy, where appropriate will improve the  
288 function and quality of life for individuals with 3q29del.



289  
290  
291  
292  
293  
294  
295  
296  
297  
298  
299  
300  
301  
302  
303  
304  
305  
306  
307  
308  
309  
310  
311  
312  
313  
314  
315  
316  
317  
318  
319  
320  
321  
322  
323  
324  
325  
326  
327  
328  
329  
330  
331

## References

- Al-Kateb, H., Khanna, G., Filges, I., Hauser, N., Grange, D. K., Shen, J., Smyser, C. D., Kulkarni, S., & Shinawi, M. (2014). Scoliosis and vertebral anomalies: additional abnormal phenotypes associated with chromosome 16p11.2 rearrangement. *American Journal of Medical Genetics. Part A*, *164a*(5), 1118-1126. <https://doi.org/10.1002/ajmg.a.36401>
- Andersen, L. K., Knak, K. L., Witting, N., & Vissing, J. (2016). Two- and 6-minute walk tests assess walking capability equally in neuromuscular diseases. *Neurology*, *86*(5), 442-445. <https://doi.org/10.1212/wnl.0000000000002332>
- Ballif, B. C., Theisen, A., Coppinger, J., Gowans, G. C., Hersh, J. H., Madan-Khetarpal, S., Schmidt, K. R., Tervo, R., Escobar, L. F., Friedrich, C. A., McDonald, M., Campbell, L., Ming, J. E., Zackai, E. H., Bejjani, B. A., & Shaffer, L. G. (2008). Expanding the clinical phenotype of the 3q29 microdeletion syndrome and characterization of the reciprocal microduplication. *Molecular Cytogenetics*, *1*, 8. <https://doi.org/10.1186/1755-8166-1-8>
- Bassett, A. S., Chow, E. W., Husted, J., Weksberg, R., Caluseriu, O., Webb, G. D., & Gatzoulis, M. A. (2005). Clinical features of 78 adults with 22q11 Deletion Syndrome. *American Journal of Medical Genetics. Part A*, *138*(4), 307-313. <https://doi.org/10.1002/ajmg.a.30984>
- Chapman, C. A., du Plessis, A., & Pober, B. R. (1996). Neurologic findings in children and adults with Williams syndrome. *J Child Neurol*, *11*(1), 63-65. <https://doi.org/10.1177/088307389601100116>
- Cherniske, E. M., Carpenter, T. O., Klaiman, C., Young, E., Bregman, J., Insogna, K., Schultz, R. T., & Pober, B. R. (2004). Multisystem study of 20 older adults with Williams syndrome. *American Journal of Medical Genetics Part A*, *131*(3), 255-264.
- Copes, L. E., Pober, B. R., & Terilli, C. A. (2016). Description of common musculoskeletal findings in Williams Syndrome and implications for therapies. *Clin Anat*, *29*(5), 578-589. <https://doi.org/10.1002/ca.22685>
- Cox, D. M., & Butler, M. G. (2015). A clinical case report and literature review of the 3q29 microdeletion syndrome. *Clinical dysmorphology*, *24*(3), 89-94. <https://doi.org/10.1097/MCD.0000000000000077>
- Damasceno, M. L., Cristante, A. F., Marcon, R. M., & Barros Filho, T. E. (2014). Prevalence of scoliosis in Williams-Beuren syndrome patients treated at a regional reference center. *Clinics (Sao Paulo)*, *69*(7), 452-456. [https://doi.org/10.6061/clinics/2014\(07\)02](https://doi.org/10.6061/clinics/2014(07)02)
- Digilio, M. C., Angioni, A., De Santis, M., Lombardo, A., Giannotti, A., Dallapiccola, B., & Marino, B. (2003). Spectrum of clinical variability in familial deletion 22q11.2: from full manifestation to extremely mild clinical anomalies. *Clin Genet*, *63*(4), 308-313. <https://doi.org/10.1034/j.1399-0004.2003.00049.x>
- Ficcadenti, A., Zallocco, F., Neri, R., Giovannini, L., Tirabassi, G., & Balercia, G. (2015). Bone density assessment in a cohort of pediatric patients affected by 22q11DS. *J Endocrinol Invest*, *38*(10), 1093-1098. <https://doi.org/10.1007/s40618-015-0295-6>
- García-Rodríguez, A., Martín-Jiménez, F., Carnero-Varo, M., Gómez-Gracia, E., Gómez-Aracena, J., & Fernández-Crehuet, J. (1999). Flexible flat feet in children: a real problem? *Pediatrics*, *103*(6), e84. <https://doi.org/10.1542/peds.103.6.e84>

- 332 Girirajan, S., Rosenfeld, J. A., Coe, B. P., Parikh, S., Friedman, N., Goldstein, A., Filipink, R. A.,  
333 McConnell, J. S., Angle, B., & Meschino, W. S. (2012). Phenotypic heterogeneity of  
334 genomic disorders and rare copy-number variants. *New England Journal of Medicine*,  
335 367(14), 1321-1331.
- 336 Glassford, M. R., Rosenfeld, J. A., Freedman, A. A., Zwick, M. E., Mulle, J. G., & Unique Rare  
337 Chromosome Disorder Support, G. (2016). Novel features of 3q29 deletion syndrome:  
338 Results from the 3q29 registry. *American Journal of Medical Genetics. Part A*, 170A(4),  
339 999-1006. <https://doi.org/10.1002/ajmg.a.37537>
- 340 Homans, J. F., Tromp, I. N., Colo, D., Schlösser, T. P. C., Kruyt, M. C., Deeney, V. F. X., Crowley, T.  
341 B., McDonald-McGinn, D. M., & Castelein, R. M. (2018). Orthopaedic manifestations  
342 within the 22q11.2 Deletion syndrome: A systematic review. *American Journal of*  
343 *Medical Genetics. Part A*, 176(10), 2104-2120. <https://doi.org/10.1002/ajmg.a.38545>
- 344 Itsara, A., Cooper, G. M., Baker, C., Girirajan, S., Li, J., Absher, D., Krauss, R. M., Myers, R. M.,  
345 Ridker, P. M., Chasman, D. I., Mefford, H., Ying, P., Nickerson, D. A., & Eichler, E. E.  
346 (2009). Population analysis of large copy number variants and hotspots of human  
347 genetic disease. *American Journal of Human Genetics*, 84(2), 148-161.  
348 <https://doi.org/10.1016/j.ajhg.2008.12.014>
- 349 Kaplan, P., Kirschner, M., Watters, G., & Costa, M. T. (1989). Contractures in patients with  
350 Williams syndrome. *Pediatrics*, 84(5), 895-899.
- 351 Kendall, K. M., Rees, E., Escott-Price, V., Einon, M., Thomas, R., Hewitt, J., O'Donovan, M. C.,  
352 Owen, M. J., Walters, J. T. R., & Kirov, G. (2017). Cognitive Performance Among Carriers  
353 of Pathogenic Copy Number Variants: Analysis of 152,000 UK Biobank Subjects.  
354 *Biological Psychiatry*, 82(2), 103-110. <https://doi.org/10.1016/j.biopsych.2016.08.014>
- 355 Kirov, G., Pocklington, A. J., Holmans, P., Ivanov, D., Ikeda, M., Ruderfer, D., Moran, J.,  
356 Chambert, K., Toncheva, D., Georgieva, L., Grozeva, D., Fjodorova, M., Wollerton, R.,  
357 Rees, E., Nikolov, I., van de Lagemaat, L. N., Bayés, A., Fernandez, E., Olason, P. I., . . .  
358 Owen, M. J. (2012). De novo CNV analysis implicates specific abnormalities of  
359 postsynaptic signalling complexes in the pathogenesis of schizophrenia. *Molecular*  
360 *Psychiatry*, 17(2), 142-153. <https://doi.org/10.1038/mp.2011.154>
- 361 Klaiman, C., White, S. P., Saulnier, C., Murphy, M., Burrell, L., Cubells, J., Walker, E., & Mulle, J.  
362 G. (2022). A distinct cognitive profile in individuals with 3q29 deletion syndrome. *J*  
363 *Intellect Disabil Res*. <https://doi.org/10.1111/jir.12919>
- 364 Konieczny, M. R., Senyurt, H., & Krauspe, R. (2013). Epidemiology of adolescent idiopathic  
365 scoliosis. *J Child Orthop*, 7(1), 3-9. <https://doi.org/10.1007/s11832-012-0457-4>
- 366 Kuettel, J., Bay, R. C., & McIsaac, T. L. (2022). Configuration variability of the six-minute walk  
367 test among licensed physical therapists working with neurologic conditions: a pilot  
368 survey. *Physiotherapy Theory and Practice*, 1-17.  
369 <https://doi.org/10.1080/09593985.2022.2140318>
- 370 Marshall, C. R., Howrigan, D. P., Merico, D., Thiruvahindrapuram, B., Wu, W., Greer, D. S.,  
371 Antaki, D., Shetty, A., Holmans, P. A., Pinto, D., Gujral, M., Brandler, W. M., Malhotra, D.,  
372 Wang, Z., Fajardo, K. V. F., Maile, M. S., Ripke, S., Agartz, I., Albus, M., . . . Schizophrenia  
373 Working Groups of the Psychiatric Genomics, C. (2017). Contribution of copy number  
374 variants to schizophrenia from a genome-wide study of 41,321 subjects. *Nature*  
375 *Genetics*, 49(1), 27-35. <https://doi.org/10.1038/ng.3725>

- 376 Martin, N., Snodgrass, G., & Cohen, R. (1984). Idiopathic infantile hypercalcaemia--a continuing  
377 enigma. *Archives of Disease in Childhood*, *59*(7), 605-613.
- 378 Morava, E., Lacassie, Y., King, A., Illes, T., & Marble, M. (2002). Scoliosis in velo-cardio-facial  
379 syndrome. *J Pediatr Orthop*, *22*(6), 780-783.
- 380 Morris, C. A., Demsey, S. A., Leonard, C. O., Dilts, C., & Blackburn, B. L. (1988). Natural history of  
381 Williams syndrome: physical characteristics. *The Journal of Pediatrics*, *113*(2), 318-326.
- 382 Mulle, J. G. (2015). The 3q29 deletion confers >40-fold increase in risk for schizophrenia.  
383 *Molecular Psychiatry*, *20*(9), 1028-1029. <https://doi.org/10.1038/mp.2015.76>
- 384 Mulle, J. G., Dodd, A. F., McGrath, J. A., Wolyniec, P. S., Mitchell, A. A., Shetty, A. C., Sobreira, N.  
385 L., Valle, D., Rudd, M. K., Satten, G., Cutler, D. J., Pulver, A. E., & Warren, S. T. (2010).  
386 Microdeletions of 3q29 confer high risk for schizophrenia. *American Journal of Human*  
387 *Genetics*, *87*(2), 229-236. <https://doi.org/10.1016/j.ajhg.2010.07.013>
- 388 Naranje, S. M., Erali, R. A., Warner, W. C., Jr., Sawyer, J. R., & Kelly, D. M. (2016). Epidemiology  
389 of Pediatric Fractures Presenting to Emergency Departments in the United States. *J*  
390 *Pediatr Orthop*, *36*(4), e45-48. <https://doi.org/10.1097/bpo.0000000000000595>
- 391 Pollak, R. M., Murphy, M. M., Epstein, M. P., Zwick, M. E., Klaiman, C., Saulnier, C. A., the Emory  
392 3q29 Project, & Mulle, J. G. (2019). Neuropsychiatric phenotypes and a distinct  
393 constellation of ASD features in 3q29 deletion syndrome: results from the 3q29 registry.  
394 *Mol Autism*, *10*(1), 30. <https://doi.org/10.1186/s13229-019-0281-5>
- 395 R Core Team. (2008). R: A language and environment for statistical computing. *R Foundation for*  
396 *Statistical Computing, Vienna, Austria*. <https://www.r-project.org/>
- 397 Ren, X., Yang, N., Wu, N., Xu, X., Chen, W., Zhang, L., Li, Y., Du, R. Q., Dong, S., Zhao, S., Chen, S.,  
398 Jiang, L. P., Wang, L., Zhang, J., Wu, Z., Jin, L., Qiu, G., Lupski, J. R., Shi, J., . . . Liu, P.  
399 (2020). Increased TBX6 gene dosages induce congenital cervical vertebral malformations  
400 in humans and mice. *Journal of Medical Genetics*, *57*(6), 371-379.  
401 <https://doi.org/10.1136/jmedgenet-2019-106333>
- 402 Ricchetti, E. T., States, L., Hosalkar, H. S., Tamai, J., Maisenbacher, M., McDonald-McGinn, D.  
403 M., Zackai, E. H., & Drummond, D. S. (2004). Radiographic study of the upper cervical  
404 spine in the 22q11.2 deletion syndrome. *J Bone Joint Surg Am*, *86*(8), 1751-1760.  
405 <https://doi.org/10.2106/00004623-200408000-00020>
- 406 Sanchez Russo, R., Gambello, M. J., Murphy, M. M., Aberizk, K., Black, E., Burrell, T. L., Carlock,  
407 G., Cubells, J. F., Epstein, M. T., Espana, R., Goines, K., Guest, R. M., Klaiman, C., Koh, S.,  
408 Leslie, E. J., Li, L., Novacek, D. M., Saulnier, C. A., Sefik, E., . . . Mulle, J. G. (2021). Deep  
409 phenotyping in 3q29 deletion syndrome: recommendations for clinical care. *Genetics in*  
410 *Medicine*, *23*(5), 872-880. <https://doi.org/10.1038/s41436-020-01053-1>
- 411 Sanders, S. J., He, X., Willsey, A. J., Ercan-Sencicek, A. G., Samocha, K. E., Cicek, A. E., Murtha, M.  
412 T., Bal, V. H., Bishop, S. L., Dong, S., Goldberg, A. P., Jinlu, C., Keaney, J. F., 3rd, Klei, L.,  
413 Mandell, J. D., Moreno-De-Luca, D., Poultney, C. S., Robinson, E. B., Smith, L., . . . State,  
414 M. W. (2015). Insights into Autism Spectrum Disorder Genomic Architecture and Biology  
415 from 71 Risk Loci. *Neuron*, *87*(6), 1215-1233.  
416 <https://doi.org/10.1016/j.neuron.2015.09.016>
- 417 Sievert, C., Parmer, C., Hocking, T., Chamberlain, S., Ram, K., Corvellec, M., & Despouy, P.  
418 (2017). plotly: Create Interactive Web Graphics via 'plotly.js'. *R package version 4.6.0*.  
419 <https://CRAN.R-project.org/package=plotly>

- 420 Stagi, S., Lapi, E., Gambineri, E., Manoni, C., Genuardi, M., Colarusso, G., Conti, C., Chiarelli, F.,  
421 de Martino, M., & Azzari, C. (2010). Bone density and metabolism in subjects with  
422 microdeletion of chromosome 22q11 (del22q11). *Eur J Endocrinol*, *163*(2), 329-337.  
423 <https://doi.org/10.1530/eje-10-0167>
- 424 Stefansson, H., Meyer-Lindenberg, A., Steinberg, S., Magnusdottir, B., Morgen, K., Arnarsdottir,  
425 S., Bjornsdottir, G., Walters, G. B., Jonsdottir, G. A., Doyle, O. M., Tost, H., Grimm, O.,  
426 Kristjansdottir, S., Snorrason, H., Davidsdottir, S. R., Gudmundsson, L. J., Jonsson, G. F.,  
427 Stefansdottir, B., Helgadottir, I., . . . Stefansson, K. (2014). CNVs conferring risk of autism  
428 or schizophrenia affect cognition in controls. *Nature*, *505*(7483), 361-366.  
429 <https://doi.org/10.1038/nature12818>
- 430 Szatkiewicz, J. P., O'Dushlaine, C., Chen, G., Chambert, K., Moran, J. L., Neale, B. M., Fromer, M.,  
431 Ruderfer, D., Akterin, S., Bergen, S. E., Kähler, A., Magnusson, P. K. E., Kim, Y., Crowley, J.  
432 J., Rees, E., Kirov, G., O'Donovan, M. C., Owen, M. J., Walters, J., . . . Sullivan, P. F. (2014).  
433 Copy number variation in schizophrenia in Sweden [Immediate Communication].  
434 *Molecular Psychiatry*, *19*, 762. <https://doi.org/10.1038/mp.2014.40>  
435 <https://www.nature.com/articles/mp201440#supplementary-information>
- 436 Taeusch, H., Ballard, R., & Gleason, C. (2004). *Avery's Diseases of the Newborn*. Saunders.
- 437 Wawrzonek, A. J., Sharp, W., Burrell, T. L., Gillespie, S. E., Pollak, R. M., Murphy, M. M., & Mülle,  
438 J. G. (2022). Symptoms of Pediatric Feeding Disorders Among Individuals with 3q29  
439 Deletion Syndrome: A Case-Control Study. *J Dev Behav Pediatr*, *43*(3), e170-e178.  
440 <https://doi.org/10.1097/dbp.0000000000001009>
- 441 Westphal, F. L., Lima, L. C., Lima Neto, J. C., Chaves, A. R., Santos Júnior, V. L., & Ferreira, B. L.  
442 (2009). Prevalence of pectus carinatum and pectus excavatum in students in the city of  
443 Manaus, Brazil. *J Bras Pneumol*, *35*(3), 221-226. <https://doi.org/10.1590/s1806-37132009000300005>
- 444 Willatt, L., Cox, J., Barber, J., Cabanas, E. D., Collins, A., Donnai, D., FitzPatrick, D. R., Maher, E.,  
445 Martin, H., Parnau, J., Pindar, L., Ramsay, J., Shaw-Smith, C., Sistermans, E. A.,  
446 Tettenborn, M., Trump, D., de Vries, B. B. A., Walker, K., & Raymond, F. L. (2005). 3q29  
447 microdeletion syndrome: clinical and molecular characterization of a new syndrome.  
448 *American Journal of Human Genetics*, *77*(1), 154-160. <https://doi.org/10.1086/431653>
- 449 Wu, N., Ming, X., Xiao, J., Wu, Z., Chen, X., Shinawi, M., Shen, Y., Yu, G., Liu, J., Xie, H., Gucev, Z.  
450 S., Liu, S., Yang, N., Al-Kateb, H., Chen, J., Zhang, J., Hauser, N., Zhang, T., Tasic, V., . . .  
451 Zhang, F. (2015). TBX6 null variants and a common hypomorphic allele in congenital  
452 scoliosis. *N Engl J Med*, *372*(4), 341-350. <https://doi.org/10.1056/NEJMoa1406829>  
453  
454

456 **Table 1. Demographics of study participants with 3q29del.**

|                               | Mean  | SD     |
|-------------------------------|-------|--------|
| <b>Age</b>                    | 12.02 | 9.37   |
|                               | N     | %      |
| <b>Sex</b>                    |       |        |
| Male                          | 32    | 56.14% |
| Female                        | 25    | 43.86% |
| <b>Race</b>                   |       |        |
| White                         | 54    | 94.74% |
| Black                         | 1     | 1.75%  |
| Asian                         | 2     | 3.51%  |
| <b>Ethnicity</b>              |       |        |
| Not Hispanic/Latino           | 40    | 70.18% |
| Hispanic/Latino               | 7     | 12.28% |
| Unknown/not reported          | 10    | 17.54% |
| <b>Informant relationship</b> |       |        |
| Biological parent             | 52    | 91.12% |
| Self                          | 3     | 5.26%  |
| Other                         | 2     | 3.51%  |

457

458

459 **Table 2. Musculoskeletal phenotypes reported by participants with 3q29del.**

|                                           | N  | %      |
|-------------------------------------------|----|--------|
| <b>Axial phenotypes</b>                   |    |        |
| Any axial phenotype                       | 21 | 36.84% |
| Scoliosis                                 | 4  | 7.02%  |
| Cervical pain for more than 1 month       | 3  | 5.26%  |
| Thoracic pain for more than 1 month       | 1  | 1.75%  |
| Lumbar pain for more than 1 month         | 3  | 5.26%  |
| Pectus excavatum                          | 13 | 22.81% |
| Pectus carinatum                          | 3  | 5.26%  |
| Sixth lumbar vertebra                     | 0  | 0.00%  |
| <b>Extremity phenotypes</b>               |    |        |
| Any extremity phenotype                   | 39 | 68.42% |
| Joint stiffness                           | 16 | 28.07% |
| Joint contracture                         | 2  | 3.51%  |
| Joint laxity                              | 8  | 14.03% |
| Daily joint pain for more than 1 month    | 5  | 8.77%  |
| Pes planus                                | 23 | 40.35% |
| Long fingers                              | 10 | 17.54% |
| Camptodactyly                             | 2  | 3.51%  |
| Nail hypoplasia                           | 3  | 5.26%  |
| Uniquely shaped fingers or toes           | 9  | 15.79% |
| Bone fracture                             | 5  | 8.77%  |
| Leg length discrepancy                    | 0  | 0.00%  |
| <b>Neuromuscular phenotypes</b>           |    |        |
| Any neuromuscular phenotype               | 34 | 59.65% |
| Gait anomalies                            | 21 | 36.84% |
| Fatigue in 30 minutes or less of activity | 28 | 49.12% |

460

461

462 **Table 3. Imaging procedures reported by participants with 3q29del.**

| Body part | Imaging procedure | N | %      |
|-----------|-------------------|---|--------|
| Skull     | X-ray             | 1 | 1.75%  |
|           | CT                | 4 | 7.02%  |
|           | MRI               | 7 | 12.28% |
| Neck      | X-ray             | 1 | 1.75%  |
|           | CT                | 0 | 0.00%  |
|           | MRI               | 3 | 5.26%  |
| Spine     | X-ray             | 7 | 12.28% |
|           | CT                | 0 | 0.00%  |
|           | MRI               | 3 | 5.26%  |
| Shoulder  | X-ray             | 2 | 3.51%  |
|           | CT                | 0 | 0.00%  |
|           | MRI               | 0 | 0.00%  |
| Arm       | X-ray             | 2 | 3.51%  |
|           | CT                | 0 | 0.00%  |
|           | MRI               | 0 | 0.00%  |
| Elbow     | X-ray             | 0 | 0.00%  |
|           | CT                | 0 | 0.00%  |
|           | MRI               | 0 | 0.00%  |
| Hand      | X-ray             | 5 | 8.77%  |
|           | CT                | 0 | 0.00%  |
|           | MRI               | 0 | 0.00%  |
| Rib       | X-ray             | 1 | 1.75%  |
|           | CT                | 0 | 0.00%  |
|           | MRI               | 0 | 0.00%  |
| Pelvis    | X-ray             | 2 | 3.51%  |
|           | CT                | 0 | 0.00%  |
|           | MRI               | 1 | 1.75%  |
| Hip       | X-ray             | 5 | 8.77%  |
|           | CT                | 0 | 0.00%  |
|           | MRI               | 0 | 0.00%  |
| Leg       | X-ray             | 1 | 1.75%  |
|           | CT                | 0 | 0.00%  |
|           | MRI               | 1 | 1.75%  |
| Knee      | X-ray             | 2 | 3.51%  |
|           | CT                | 0 | 0.00%  |
|           | MRI               | 2 | 3.51%  |

|       |       |   |       |
|-------|-------|---|-------|
| Ankle | X-ray | 3 | 5.26% |
|       | CT    | 0 | 0.00% |
|       | MRI   | 0 | 0.00% |
| Foot  | X-ray | 3 | 5.26% |
|       | CT    | 0 | 0.00% |
|       | MRI   | 0 | 0.00% |

463

464



465 **Table 4. Participant-reported musculoskeletal diagnoses confirmed by imaging procedures.**

| Diagnosis              | N | %     |
|------------------------|---|-------|
| Bone fracture          | 5 | 8.77% |
| Scoliosis              | 4 | 7.02% |
| Leg length discrepancy | 0 | 0.00% |
| Mass/tumor             | 0 | 0.00% |
| Sixth lumbar vertebra  | 0 | 0.00% |
| Other condition        | 4 | 7.02% |

466

467 **Figure titles and legends**

468 **Figure 1. Musculoskeletal phenotypes reported by participants with 3q29del.** Rate of  
469 musculoskeletal phenotypes across four categories reported by participants with 3q29del (n =  
470 57).

471 **Figure 2. Specific musculoskeletal phenotypes reported by participants with 3q29del.** A) Rate  
472 of congenital musculoskeletal phenotypes reported by participants with 3q29del (n = 57). B)  
473 Rate of joint phenotypes reported by participants with 3q29del (n = 57). C) Amount of physical  
474 activity until becoming fatigued reported by participants with 3q29del (n = 57).

475 **Figure 3. Medical interventions reported by participants with 3q29del.** Rate of medical  
476 interventions received for musculoskeletal phenotypes reported by participants with 3q29del  
477 (n = 57), showing high rates of medical care needed for musculoskeletal concerns.

100

medRxiv preprint doi: <https://doi.org/10.1101/2023.04.03.23288084>; this version posted April 3, 2023. The copyright holder for this preprint (which was not certified by peer review) is the author/funder, who has granted medRxiv a license to display the preprint in perpetuity. It is made available under a [CC-BY-NC-ND 4.0 International license](#).

80

60

40

20

0

Percentage of respondents

Joint problems

Pain problems

Neuromuscular problems

Congenital anomalies

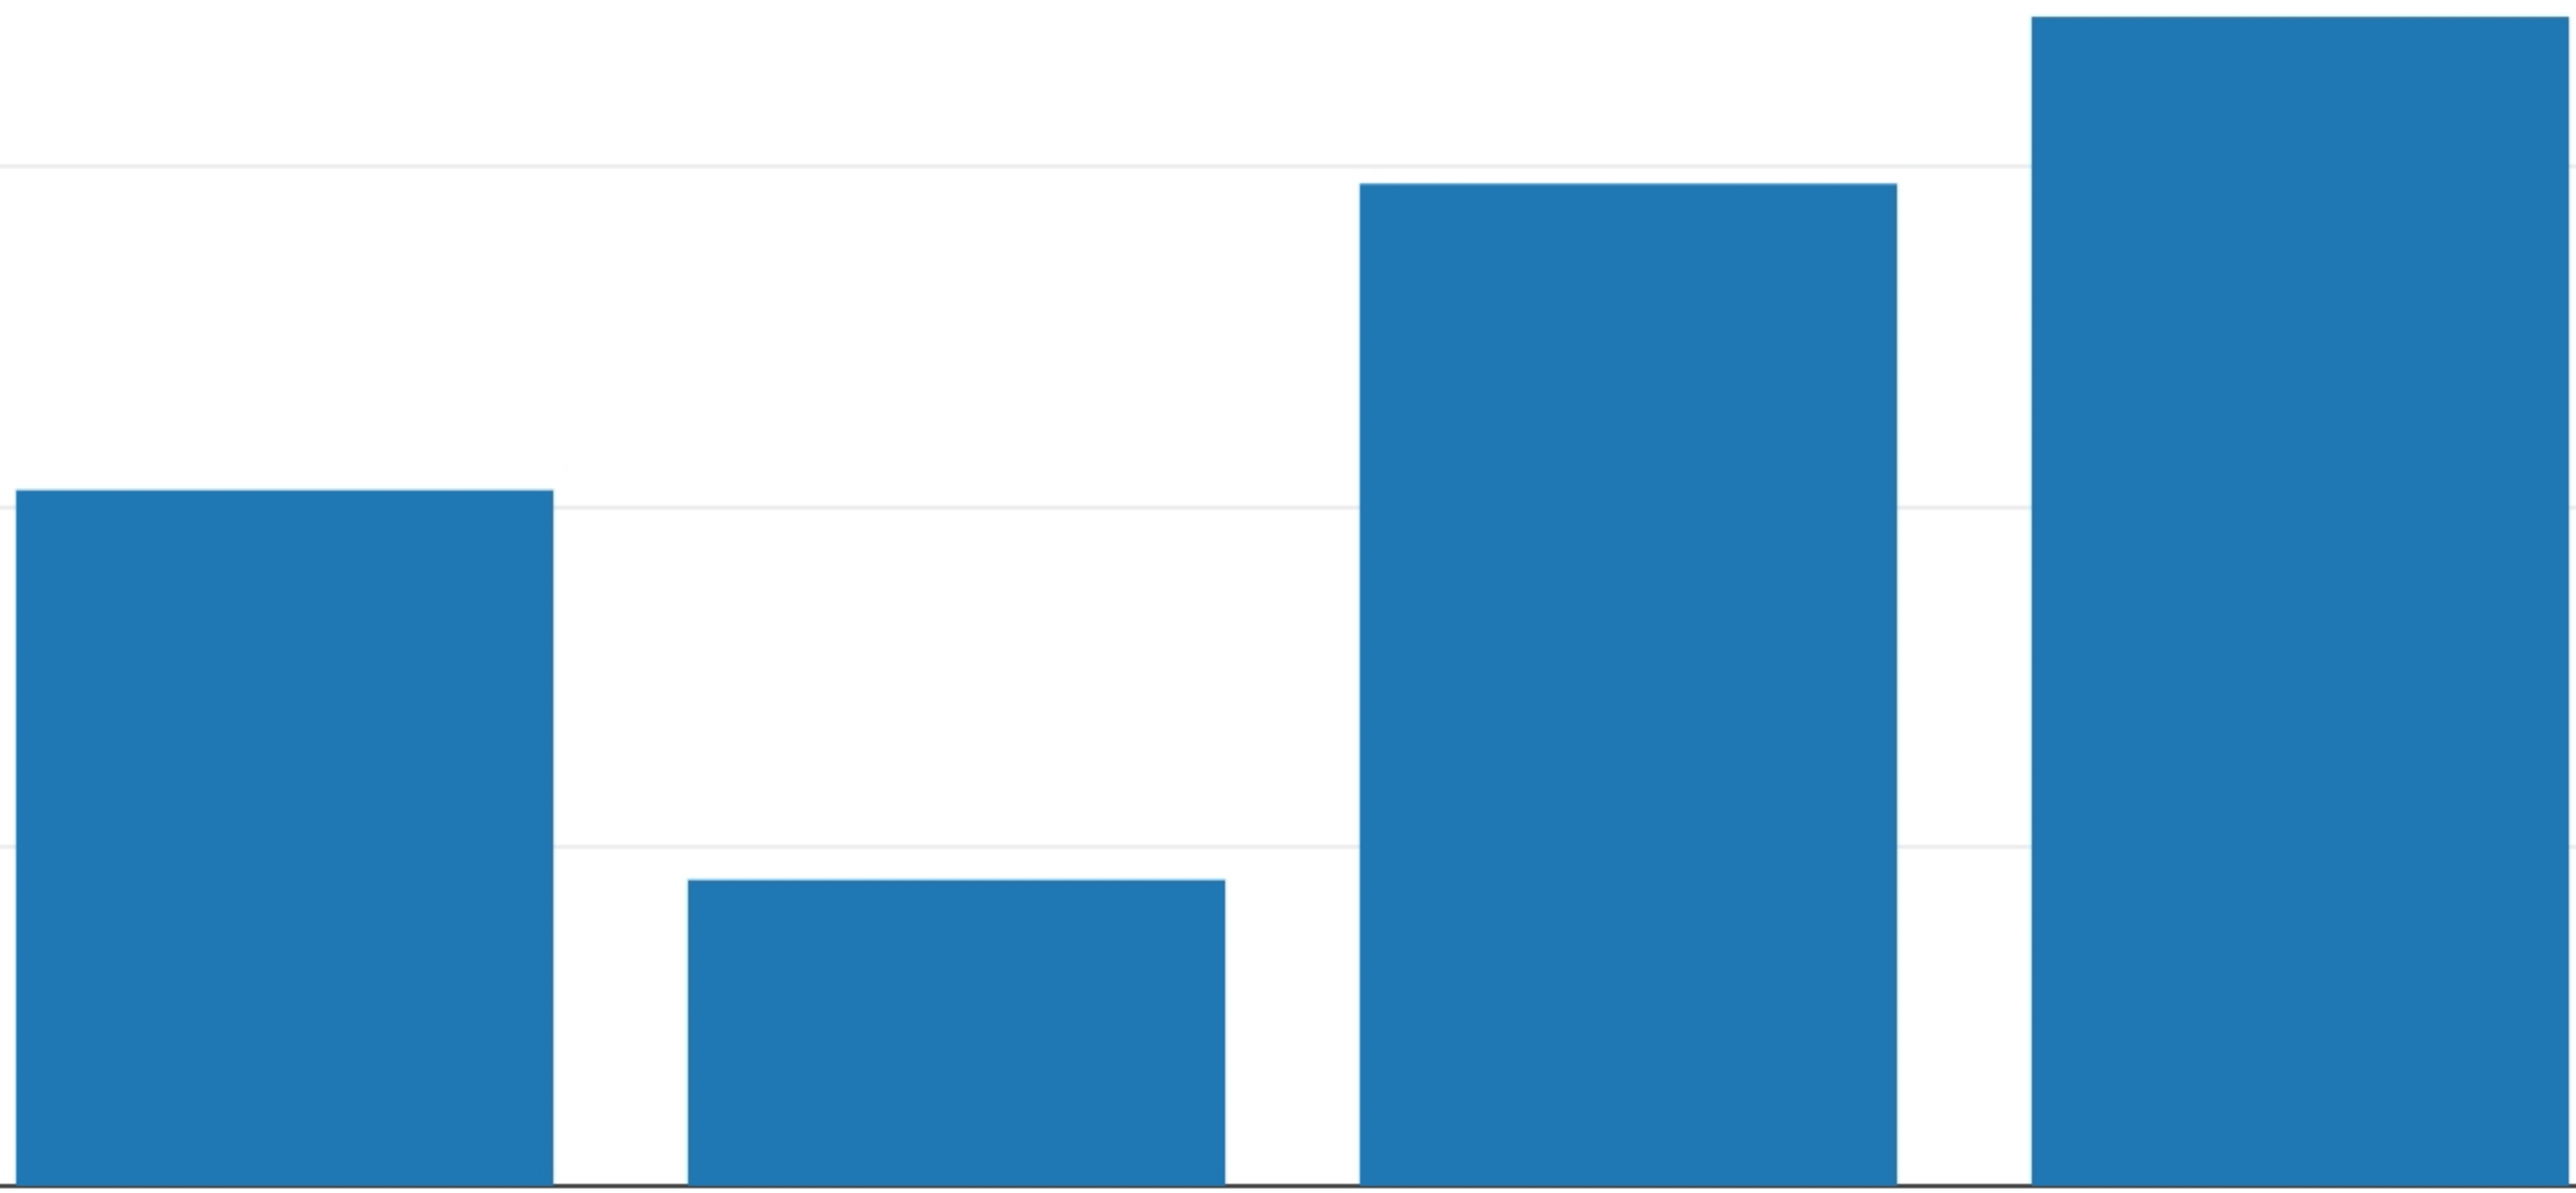

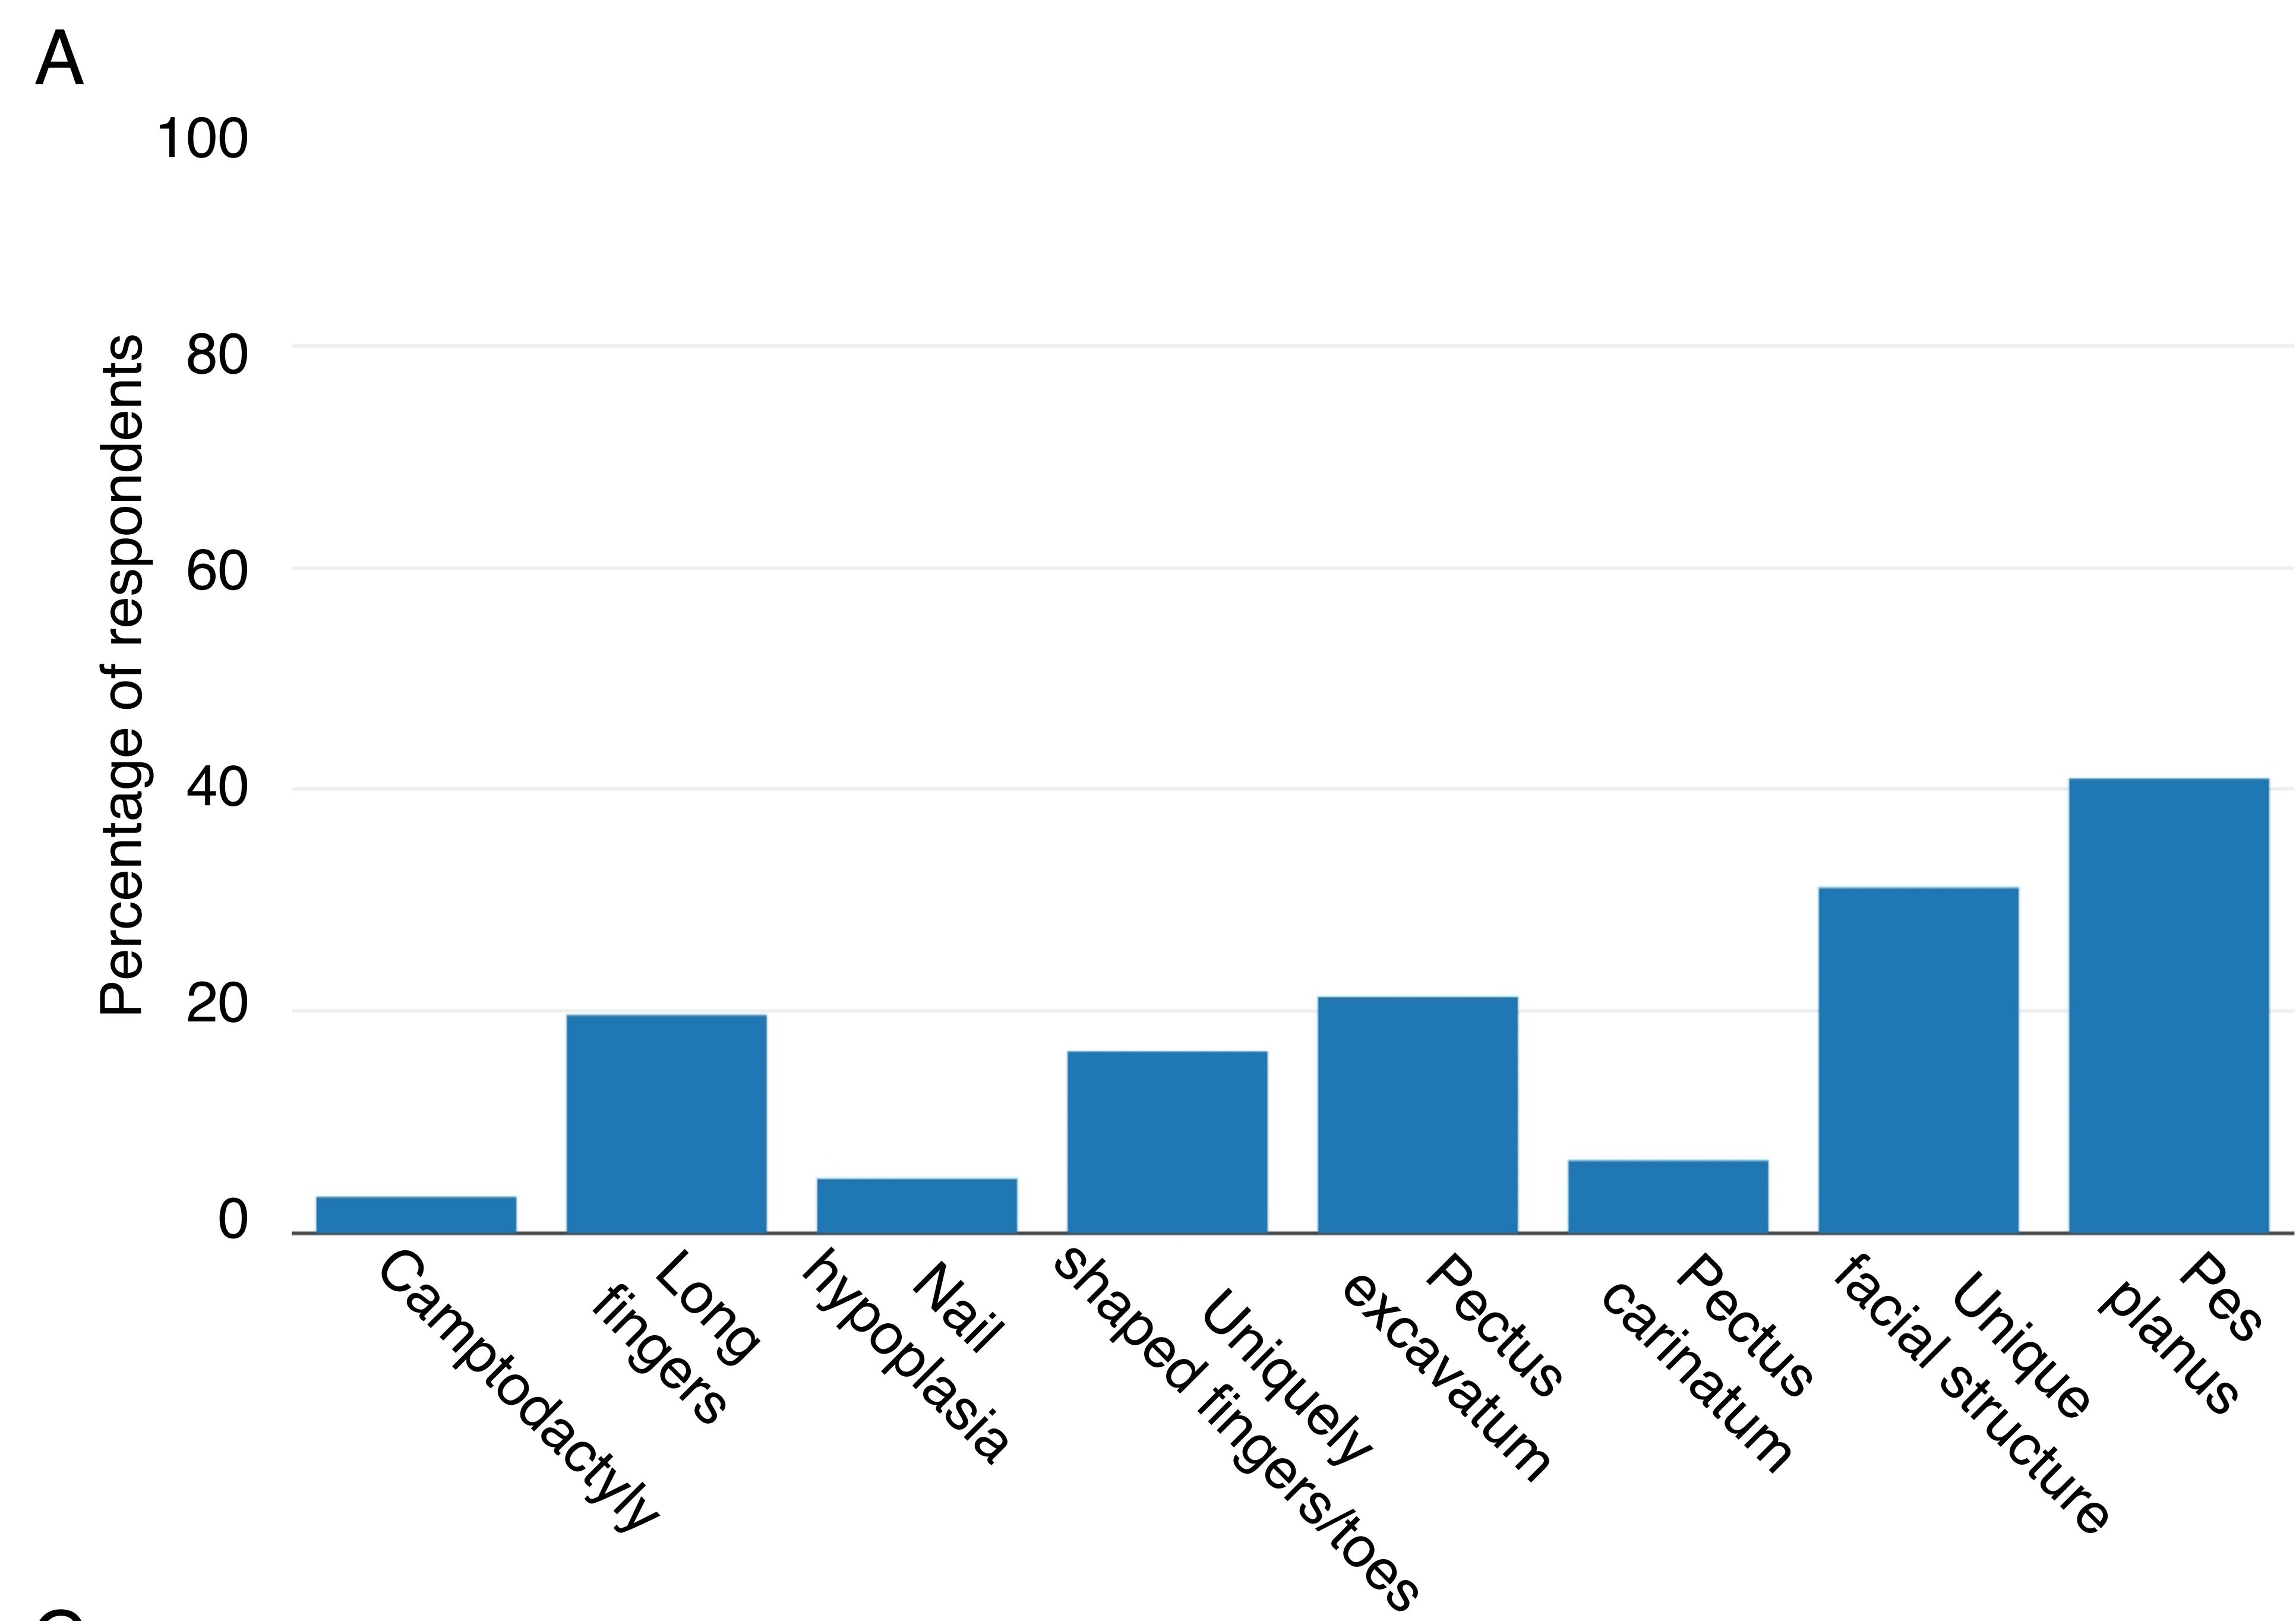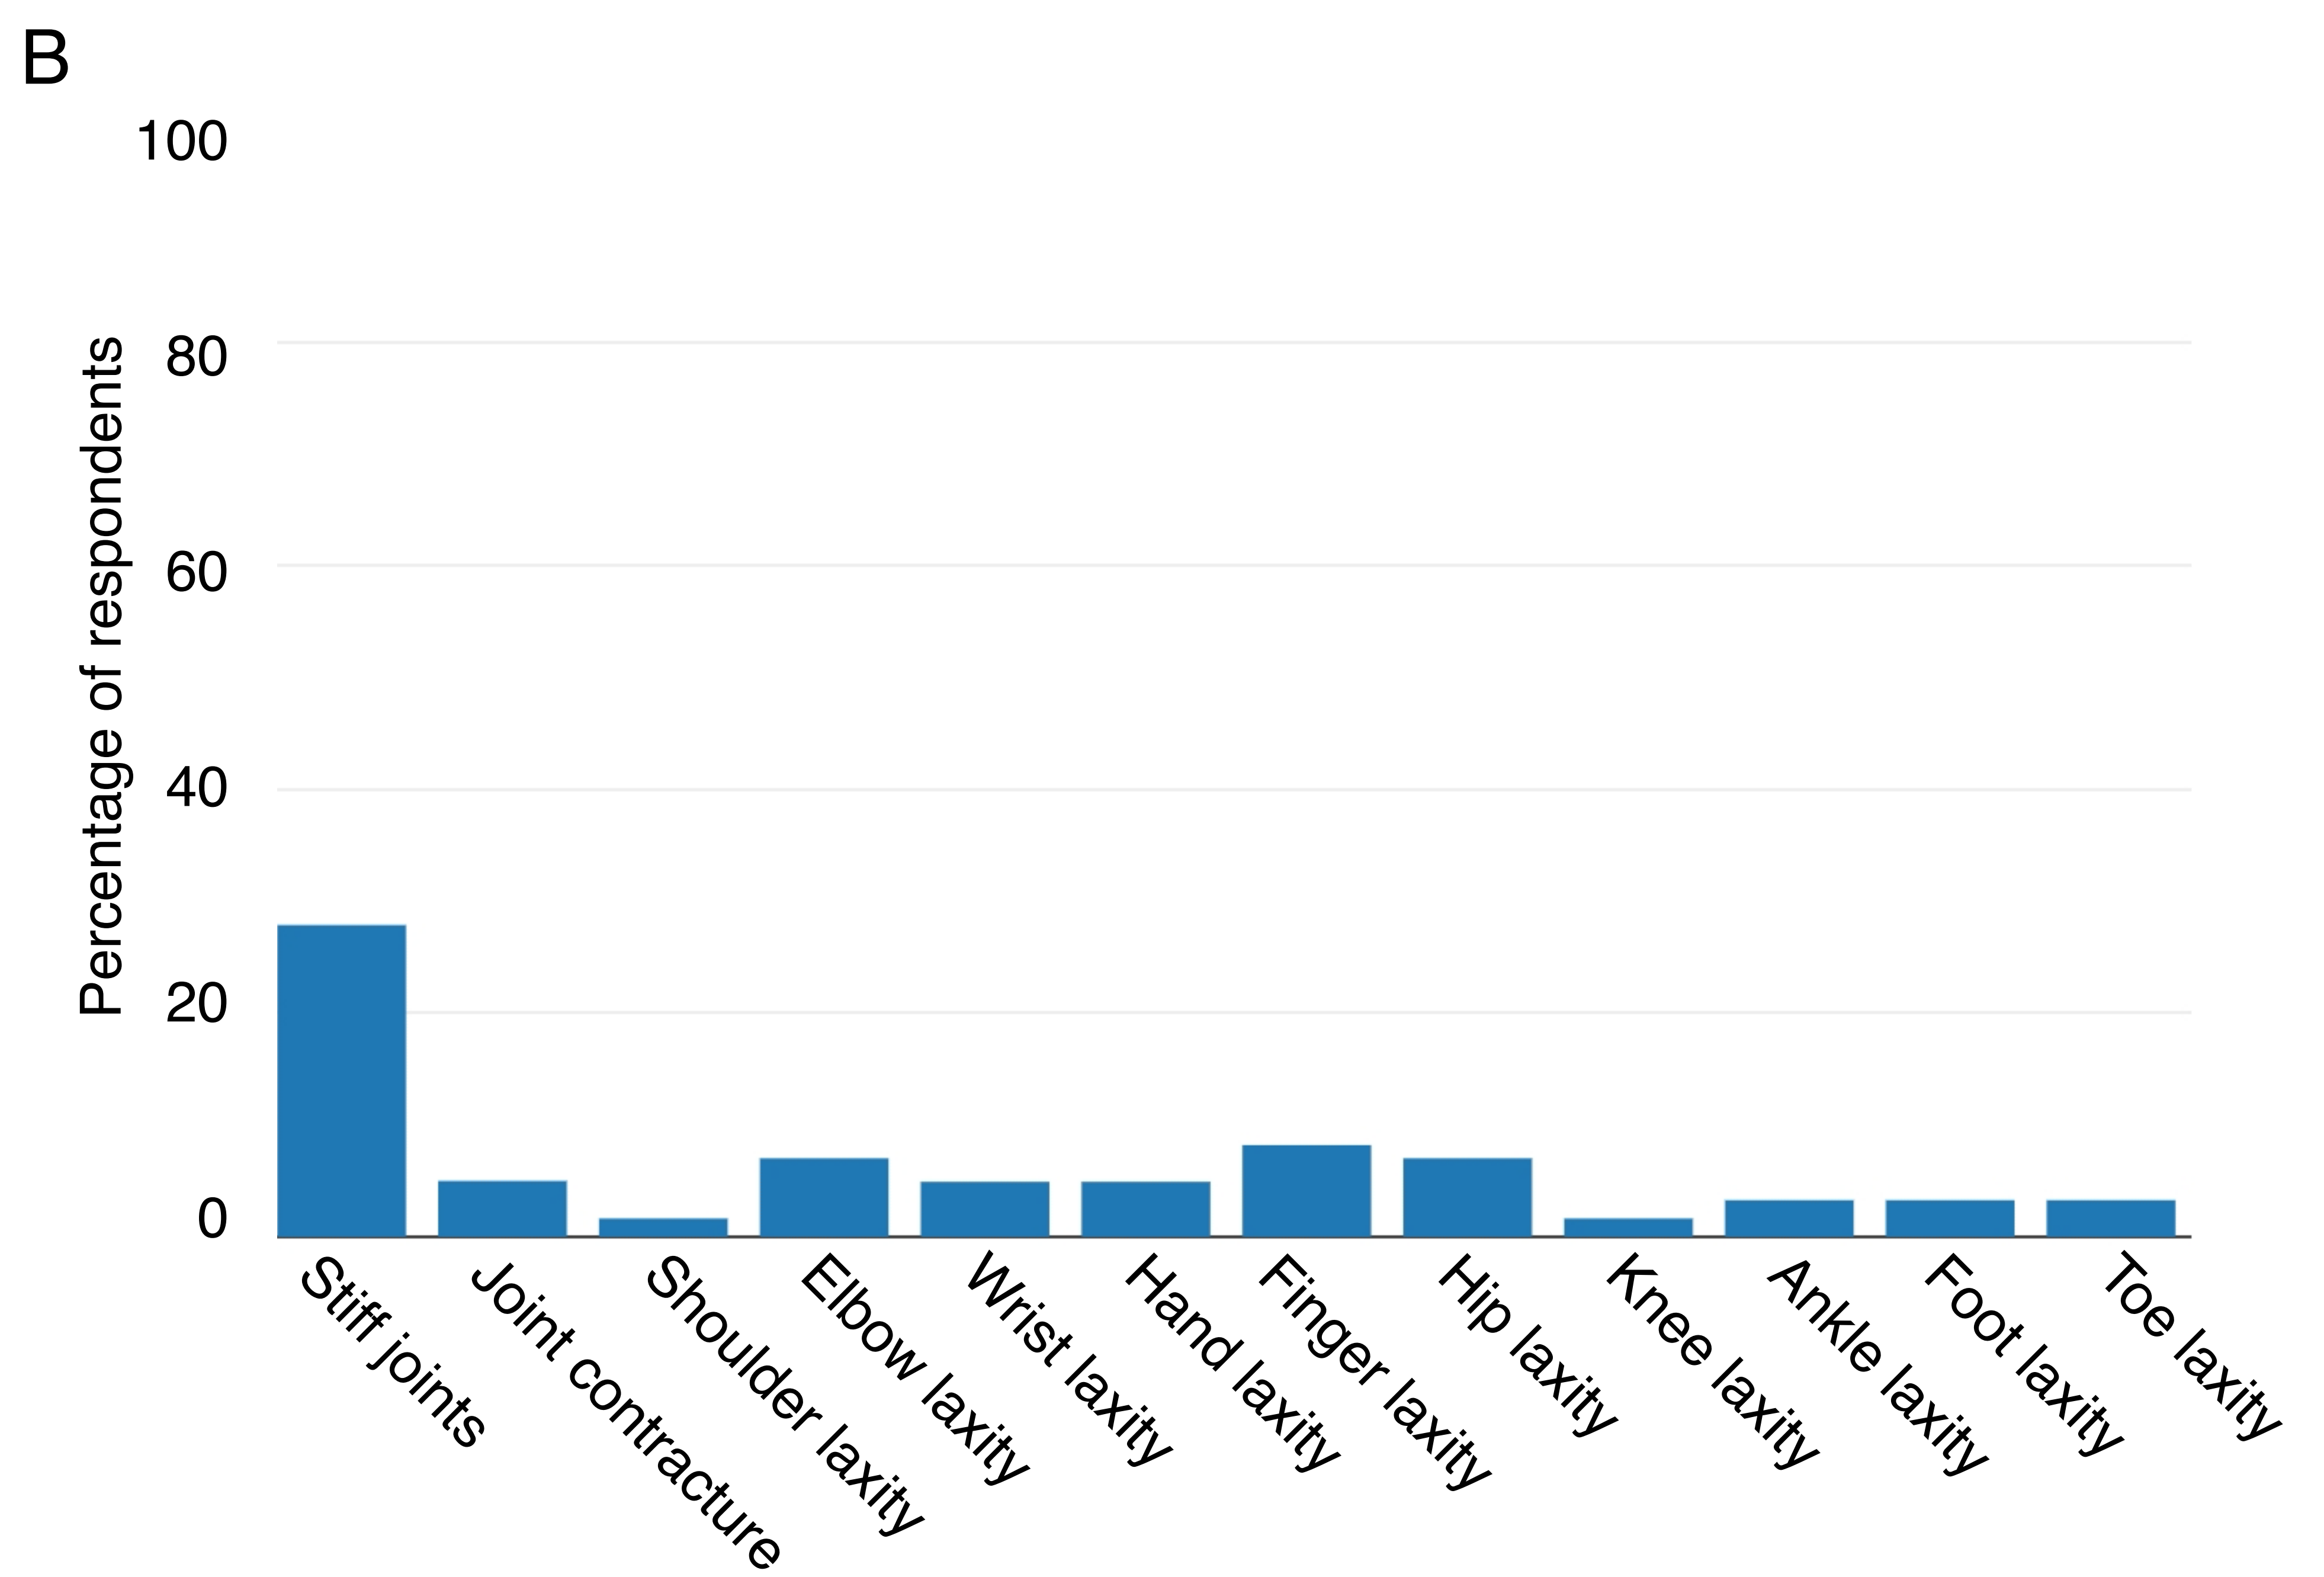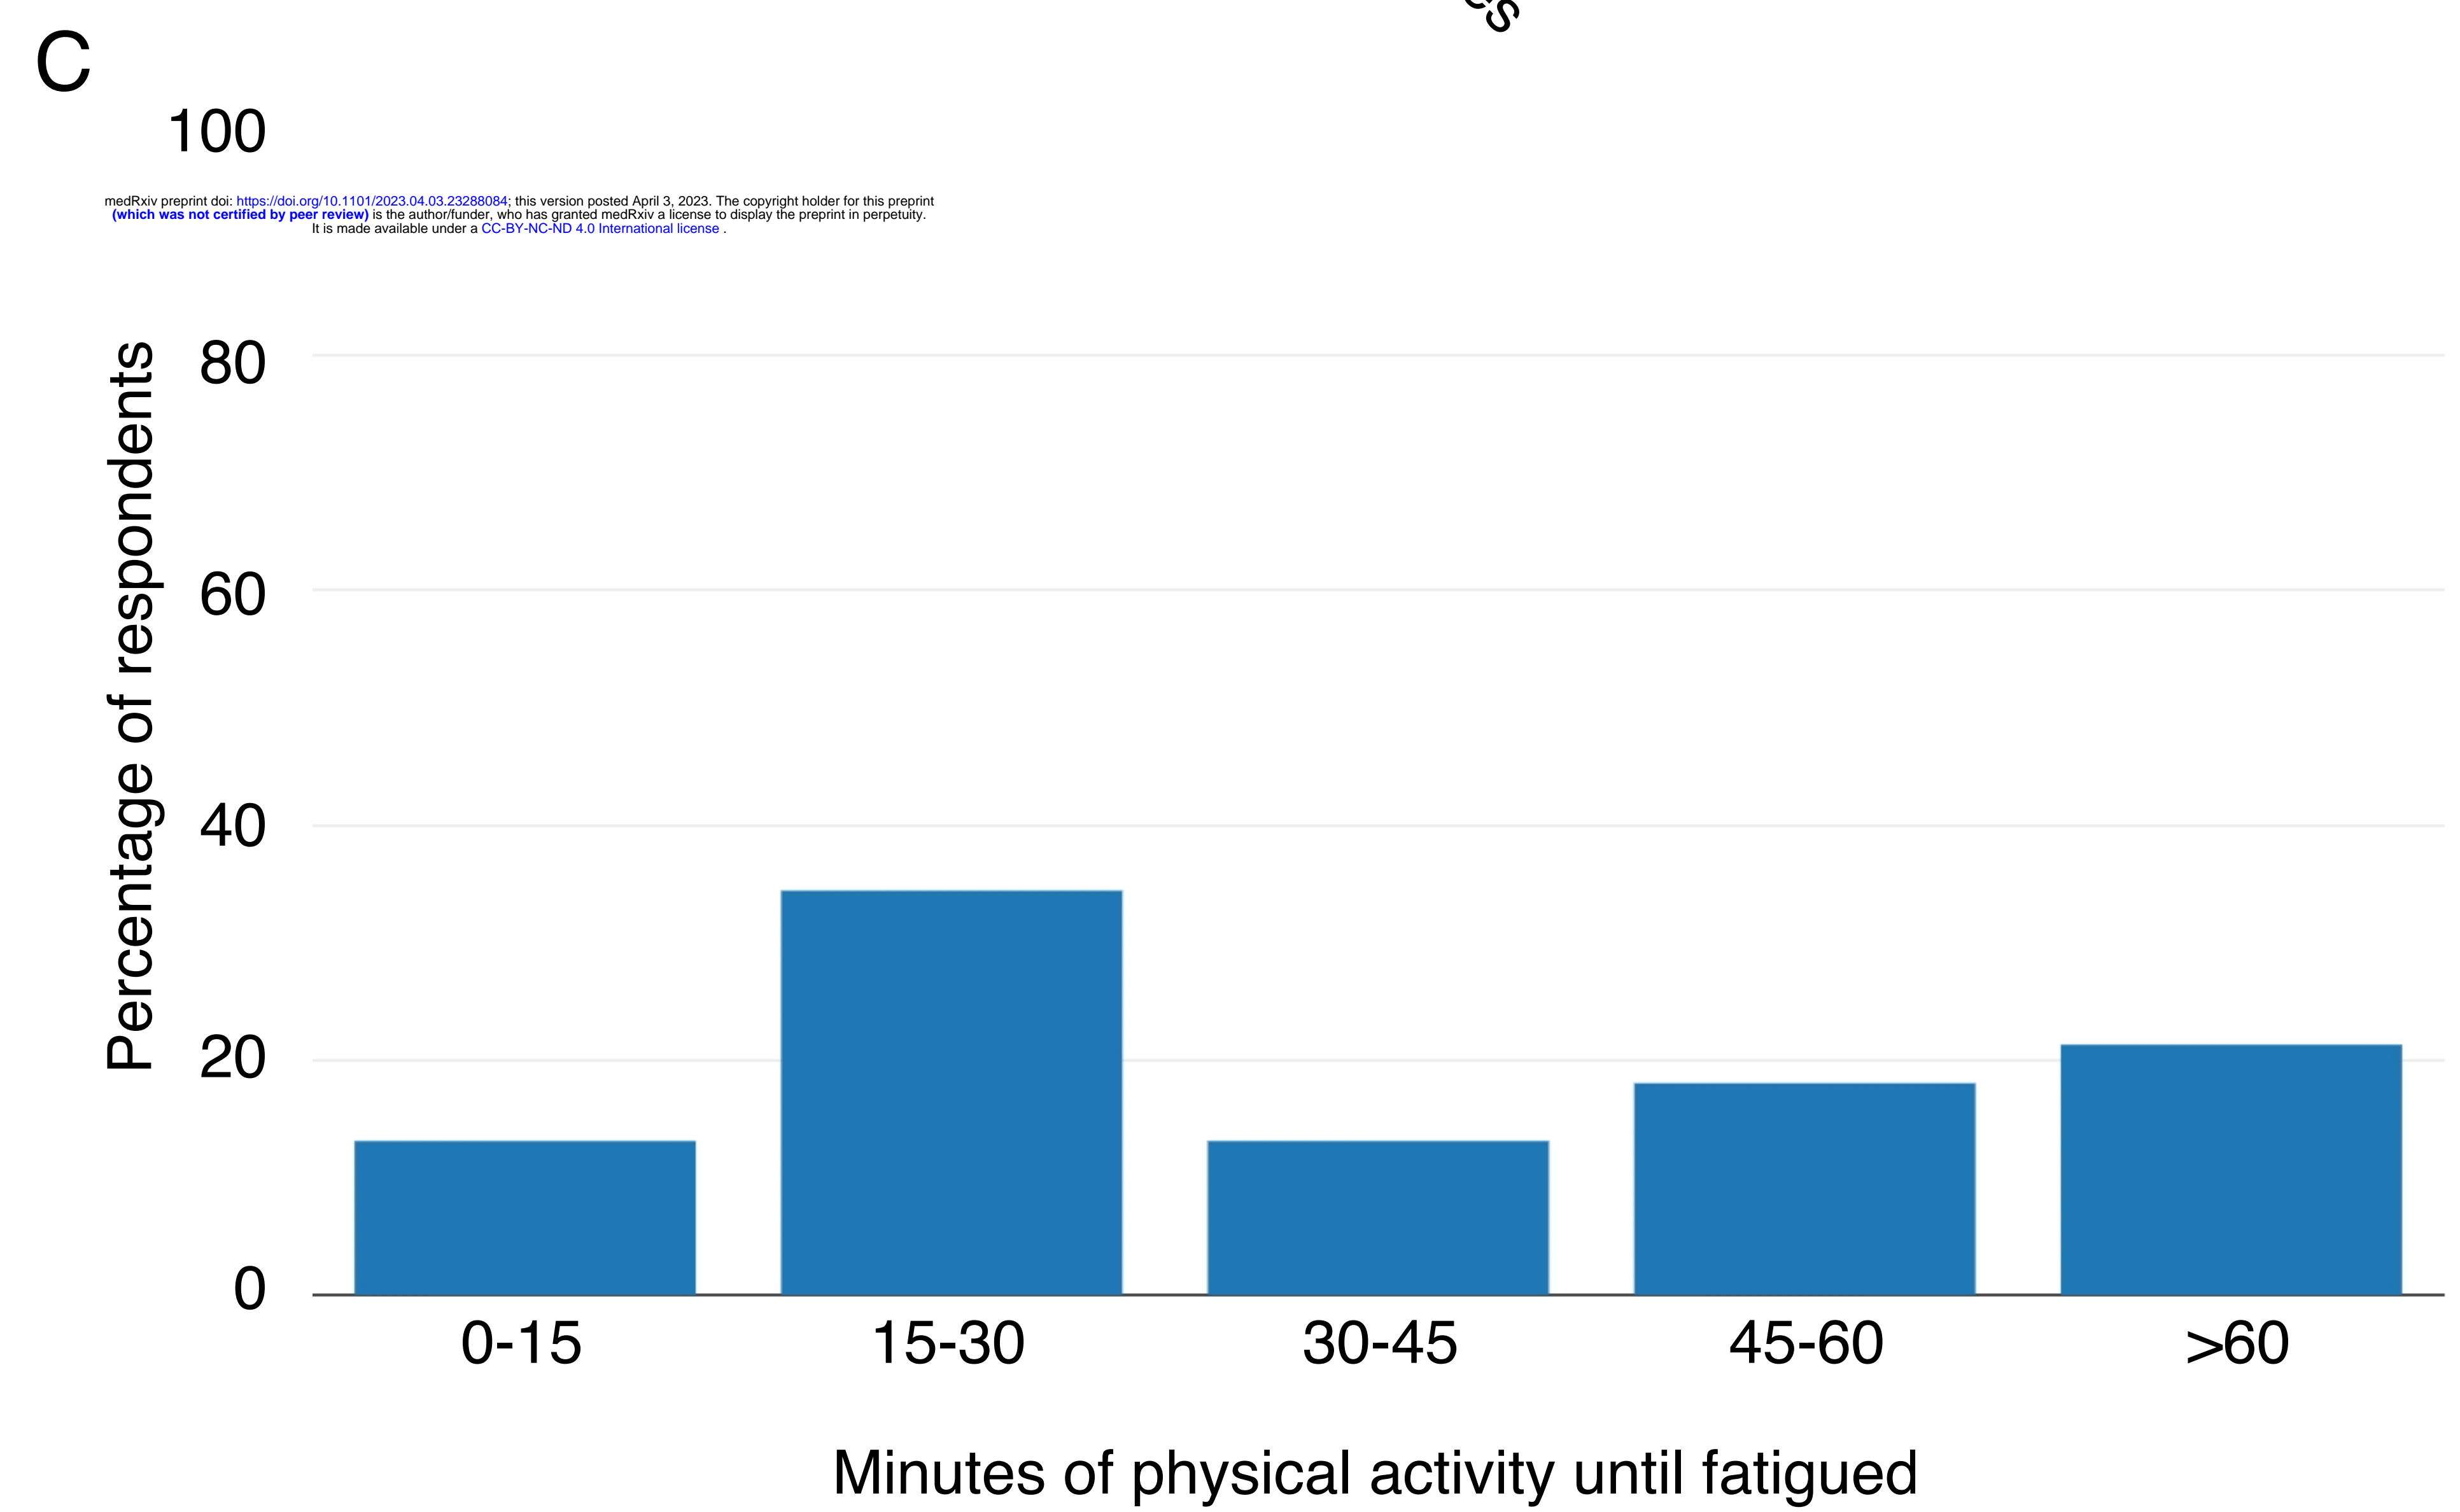

100

medRxiv preprint doi: <https://doi.org/10.1101/2023.04.03.23288084>; this version posted April 3, 2023. The copyright holder for this preprint (which was not certified by peer review) is the author/funder, who has granted medRxiv a license to display the preprint in perpetuity. It is made available under a [CC-BY-NC-ND 4.0 International license](#).

80

60

40

20

0

Percentage of respondents

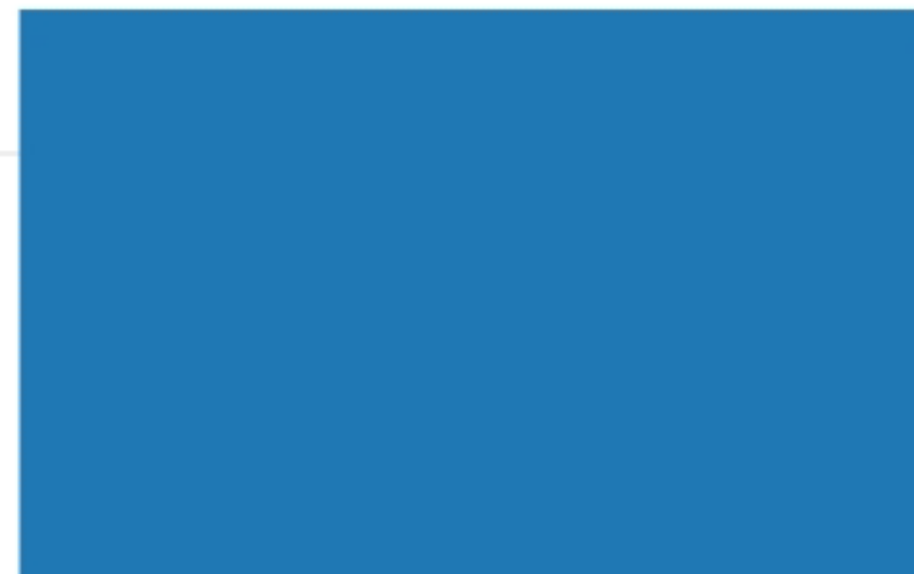

Orthopedic  
evaluation

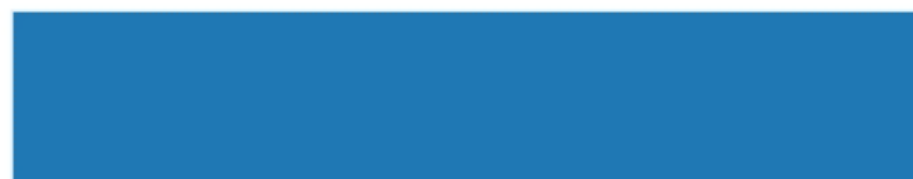

Orthopedic  
surgery

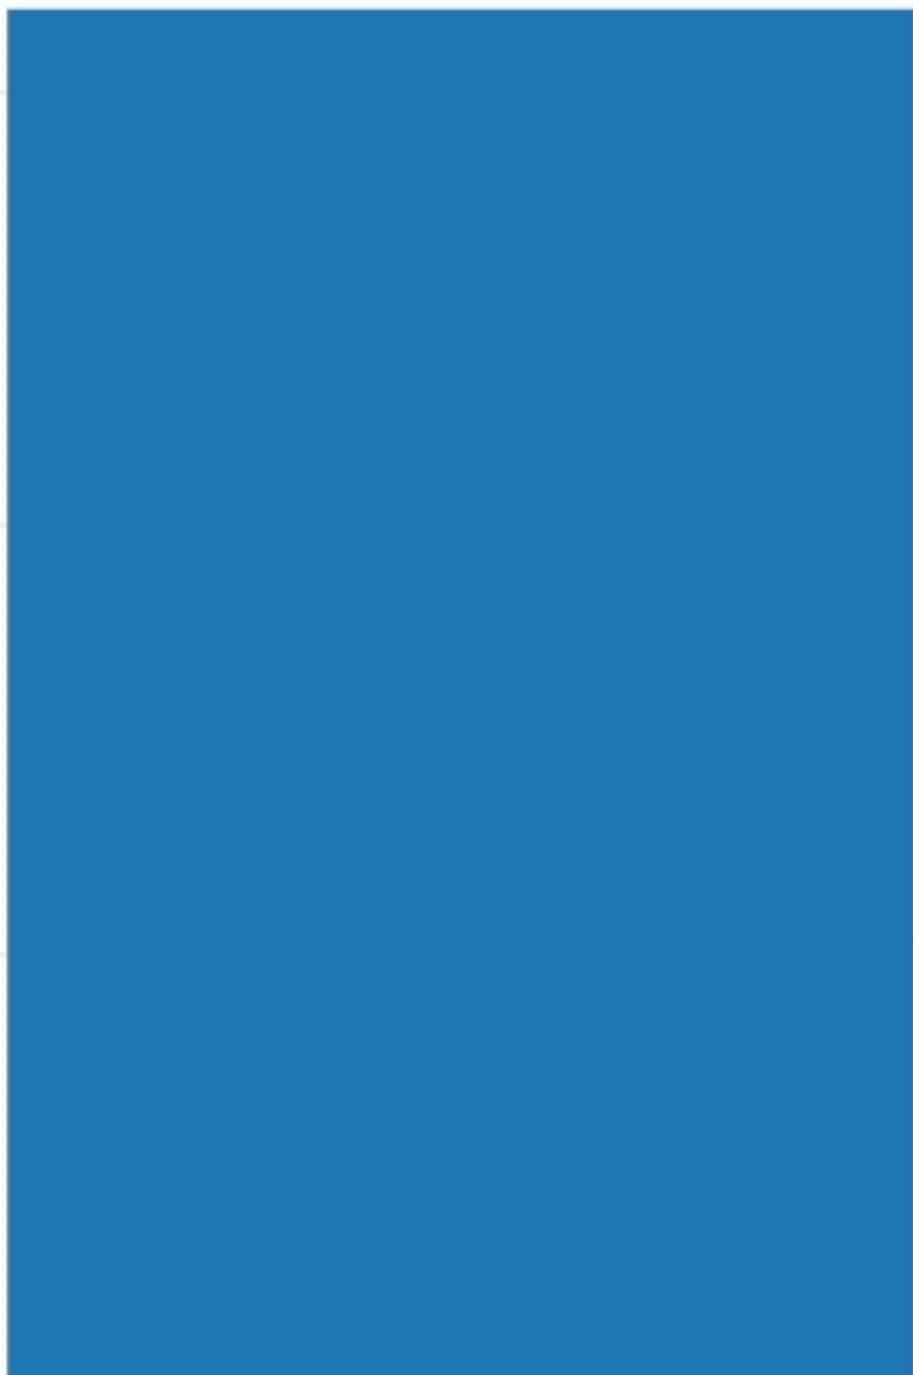

Physical  
therapy
